# Supplementary material for: Epigenetic Signatures of In Vitro and In Vivo Experimental Models Employed <span aria-describedby="tippy-29">in Non-small Cell Lung Cancer and the Unique miR-148b-3p/PVT1/ZBTB7A Regulatory Network Discriminating Large Cell Lung Carcinoma
Source: Preprints.org preprint supplement (doi:10.20944/preprints202310.1943.v1), 2023-10-30
Supplement: Supplementary file 1 [file supplementary]

## Sheet: Sheet1
Downregulated	Family		Upregulated	Family
Hairpin			Hairpin
mmu-mir-10a	mir-10		mmu-mir-130a	mir-130
mmu-mir-126a	mir-126		mmu-mir-136	mir-136
mmu-mir-126b	mir-126		mmu-mir-141	mir-8
mmu-mir-142a	mir-142		mmu-mir-146b	mir-146
mmu-mir-142b	mir-142		mmu-mir-200a	mir-8
mmu-mir-143	mir-143		mmu-mir-200b	mir-8
mmu-mir-146a	mir-146		mmu-mir-21a	mir-21
mmu-mir-195a	mir-15		mmu-mir-3071	no family
mmu-mir-199a-1	mir-199		mmu-mir-31	mir-31
mmu-mir-199a-2	mir-199		mmu-mir-376a	mir-368
mmu-mir-199b	mir-199		mmu-mir-376b	mir-368
mmu-mir-223	mir-223		mmu-mir-379	mir-379
mmu-mir-27a	mir-27		mmu-mir-411	mir-379
			mmu-mir-434	mir-434
Mature		clusters/chromosomal locations	Mature		clusters/chromosomal locations
mmu-miR-10a-5p	mir-10		mmu-miR-134-5p	mir-134	mmu-mir-300 chr12: 109724313-109724391 [+] mmu-mir-381 chr12: 109726822-109726896 [+] mmu-mir-487b chr12: 109727333-109727414 [+] mmu-mir-539 chr12: 109728129-109728202 [+] mmu-mir-544 chr12: 109729325-109729402 [+] mmu-mir-382 chr12: 109733771-109733846 [+] mmu-mir-134 chr12: 109734139-109734209 [+] mmu-mir-668 chr12: 109734732-109734797 [+] mmu-mir-485 chr12: 109734902-109734974 [+] mmu-mir-453…
mmu-miR-125b-5p	mir-10		mmu-miR-136-3p	mir-136	mmu-mir-337 chr12: 109585789-109585885 [+] mmu-mir-3544 chr12: 109585813-109585873 [-] mmu-mir-540 chr12: 109586080-109586146 [+] mmu-mir-665 chr12: 109586314-109586407 [+] mmu-mir-3070-1 chr12: 109587943-109588031 [+] mmu-mir-3070-2 chr12: 109588592-109588680 [+] mmu-mir-431 chr12: 109590447-109590537 [+] mmu-mir-433 chr12: 109591715-109591838 [+] mmu-mir-127 chr12: 109592846-109592915 [+] mmu-m…
mmu-miR-126a-3p	mir-126	mmu-mir-126a chr2: 26591357-26591429 [+] mmu-mir-126b chr2: 26591363-26591420 [-]	mmu-miR-136-5p	mir-136
mmu-miR-126a-5p	mir-126		mmu-miR-141-3p	mir-8	mmu-mir-200c chr6: 124718322-124718390 [-] mmu-mir-141 chr6: 124717914-124717985 [-] mmu-mir-200b chr4: 156055681-156055750 [-] mmu-mir-200a chr4: 156054896-156054985 [-] mmu-mir-429 chr4: 156053905-156053987 [-]
mmu-miR-126b-3p	mir-126		mmu-miR-200a-3p	mir-8
mmu-miR-126b-5p	mir-126		mmu-miR-200b-3p	mir-8
mmu-miR-142a-3p	mir-142	mmu-mir-142b chr11: 87756841-87756955 [-] mmu-mir-142a chr11: 87756864-87756927 [+]	mmu-miR-200c-3p	mir-8
mmu-miR-142a-5p	mir-142		mmu-miR-429-3p	mir-8
mmu-miR-143-3p	mir-143	mmu-mir-143 chr18: 61649196-61649258 [-] mmu-mir-145a chr18: 61647825-61647894 [-]	mmu-miR-146b-5p	mir-146
mmu-miR-145a-5p	mir-145		mmu-miR-15b-5p	mir-15
mmu-miR-146a-5p	mir-146		mmu-miR-182-5p	mir-182	mmu-mir-183 chr6: 30169668-30169737 [-] mmu-mir-96 chr6: 30169446-30169551 [-] mmu-mir-182 chr6: 30165918-30165992 [-]
mmu-miR-150-5p	mir-150		mmu-miR-19a-3p	mir-19
mmu-miR-181a-5p	mir-181		mmu-miR-19b-3p	mir-19
mmu-miR-195a-5p	mir-15	mmu-mir-497b chr11: 70234692-70234816 [-] mmu-mir-497a chr11: 70234717-70234800 [+] mmu-mir-195a chr11: 70235042-70235135 [+]	mmu-miR-208b-3p	mir-208
mmu-miR-199a-3p	mir-199		mmu-miR-21a-5p	mir-21	chr11: 86584067-86584158
mmu-miR-199a-5p	mir-199		mmu-miR-299a-5p	mir-299
mmu-miR-199b-3p	mir-199		mmu-miR-31-5p	mir-31
mmu-miR-199b-5p	mir-199		mmu-miR-32-5p	mir-32
mmu-miR-23a-3p	mir-23		mmu-miR-154-5p	mir-154	mmu-mir-666 chr12: 109717085-109717183 [+] mmu-mir-543 chr12: 109717258-109717333 [+] mmu-mir-495 chr12: 109718754-109718816 [+] mmu-mir-667 chr12: 109720006-109720097 [+] mmu-mir-376c chr12: 109722718-109722803 [+] mmu-mir-654 chr12: 109723218-109723301 [+] mmu-mir-376b chr12: 109723458-109723539 [+] mmu-mir-376a chr12: 109723781-109723848 [+] mmu-mir-300 chr12: 109724313-109724391 [+] mmu-mir-3…
mmu-miR-1a-3p	mir-1		mmu-miR-300-3p	mir-154
mmu-miR-218-5p	mir-218		mmu-miR-369-3p	mir-154
			mmu-miR-377-3p	mir-154
			mmu-miR-381-3p	mir-154
mmu-miR-451a	mir-451		mmu-miR-382-5p	mir-154
mmu-miR-221-3p	mir-221		mmu-miR-376a-3p	mir-368	mmu-mir-329 chr12: 109713481-109713577 [+] mmu-mir-494 chr12: 109715318-109715402 [+] mmu-mir-679 chr12: 109715577-109715650 [+] mmu-mir-1193 chr12: 109715671-109715791 [+] mmu-mir-666 chr12: 109717085-109717183 [+] mmu-mir-543 chr12: 109717258-109717333 [+] mmu-mir-495 chr12: 109718754-109718816 [+] mmu-mir-667 chr12: 109720006-109720097 [+] mmu-mir-376c chr12: 109722718-109722803 [+] mmu-mir-65…
mmu-miR-223-3p	mir-223		mmu-miR-376b-5p	mir-368
mmu-miR-34c-5p	mir-34		mmu-miR-376c-3p	mir-368
mmu-miR-335-5p	mir-335		mmu-miR-411-5p	mir-379	mmu-mir-379 chr12: 109709060-109709125 [+] mmu-mir-411 chr12: 109710175-109710256 [+] mmu-mir-299a chr12: 109710638-109710700 [+] mmu-mir-299b chr12: 109710645-109710693 [-] mmu-mir-380 chr12: 109711803-109711863 [+] mmu-mir-1197 chr12: 109712317-109712436 [+] mmu-mir-323 chr12: 109712508-109712593 [+] mmu-mir-758 chr12: 109712810-109712890 [+] mmu-mir-329 chr12: 109713481-109713577 [+] mmu-mir-4…
mmu-miR-338-3p	mir-338		mmu-miR-431-5p	mir-431
mmu-miR-497a-5p	mir-497	mmu-mir-497b chr11: 70234692-70234816 [-] mmu-mir-497a chr11: 70234717-70234800 [+] mmu-mir-195a chr11: 70235042-70235135 [+]	mmu-miR-96-5p	mir-96	mmu-mir-183 chr6: 30169668-30169737 [-] mmu-mir-96 chr6: 30169446-30169551 [-] mmu-mir-182 chr6: 30165918-30165992 [-]
mmu-miR-365-3p	mir-365	mmu-mir-193b chr16: 13449523-13449601 [+] mmu-mir-365-1 chr16: 13453840-13453926 [+]	mmu-miR-434-3p	mir-434	mmu-mir-337 chr12: 109585789-109585885 [+] mmu-mir-3544 chr12: 109585813-109585873 [-] mmu-mir-540 chr12: 109586080-109586146 [+] mmu-mir-665 chr12: 109586314-109586407 [+] mmu-mir-3070-1 chr12: 109587943-109588031 [+] mmu-mir-3070-2 chr12: 109588592-109588680 [+] mmu-mir-431 chr12: 109590447-109590537 [+] mmu-mir-433 chr12: 109591715-109591838 [+] mmu-mir-127 chr12: 109592846-109592915 [+] mmu-m…
